# Supplementary material for: Cross-sectional survey on researchers’ experience in using accelerometers in health-related studies
Source: HighWire-hosted journal article supplement (doi:10.1136/bmjsem-2021-001286), 2022-05-01
Supplement: bmjsem-2021-001286supp001_data_supplement.pdf [file bmjsem-2021-001286supp001_data_supplement.pdf]

## Welcome to the Survey for Activity Monitor Use in Health Research

We are a group of academic researchers from the universities of Bremen and Erlangen-Nürnberg (Germany) planning a methods project where we would like to improve usability and user-friendliness of activity monitors in health research. An expected result is open source software, and possibly a new prototype hardware solution. The project builds upon our own practical experiences with activity monitors for physical activity assessment in epidemiological studies. Although we believe in the technology, we too often encountered shortcomings and annoyances in currently available solutions.

To build a stronger base, we would like to add your experience as users of activity monitors in health research. What obstacles did you encounter when using activity monitoring in your research? How should the ideal device perform? What health-related measures are you interested in? What do you expect from the activity monitor software? Our aim is to survey how the monitoring devices are being applied to current research. The questionnaire consists of five sections. The first four sections evaluate the role and application of the monitors within your research. The fifth section contains questions about current challenges and demands for future devices and software. The survey will take about 15 minutes to complete. You can pause at any time and resume later.

You have been invited to participate because you are either listed in a clinical trial register or participated in a scientific publication on the topic. If you feel this invitation should (also) go to a different person working with data derived from activity monitors, please feel free to forward it to this person.

Your involvement in the survey is voluntary, and you may choose not to participate or stop at any time. All information is recorded and stored anonymously and cannot be traced back to individuals. The data will only be used within this research project and will neither be exploited commercially nor accessed by third parties. Your data will be handled confidentially in accordance with European data protection law (DSGVO).

For any further information, please contact [flaskamp@uni-bremen.de](mailto:flaskamp@uni-bremen.de)

*Thank you for your participation!*

*Sincerely,*

*Karin Bammann<sup>1,2</sup>, Björn Eskofier<sup>3</sup> and Fabian Flaßkamp<sup>1,2</sup>*

<sup>1</sup>Institute for Public Health and Nursing Research, University of Bremen

<sup>2</sup>Leibniz Science campus for Digital Public Health

<sup>3</sup>Machine Learning & Data Analytics Lab, University of Erlangen-Nürnberg

**1. Does your current project involve accelerometry?**

- Yes
- No

**2. In which part(s) of the activity measurements are you involved?**

*(multiple answers)*

- Planning and management
- Fieldwork
- Data downloading/Data preparation
- Data analysis/statistical modeling
- Data interpretation
- Other: Text

**3. What is/are your research population(s)?**

*(multiple answers)*

- Children/youths (0-17 years old)
- Adults (18-64 years old)
- Older adults (65+ years old)
- Other: Text

**4. What is the purpose of the accelerometer-derived data you are collecting?**

*(multiple answers)*

- Main outcome
- Secondary outcome
- Main exposure
- Secondary exposure
- Confounder
- Other: Text

**5. Which activity monitor are you using for your current research?**

*(multiple answers)*

- ActiCal
- ActiGraph GT3X family
- ActiGraph GT1M
- activPAL
- IDEEA family
- SenseWear
- Other: Text
- I don't know

## 6. Why did you choose this model?

(multiple answers)

- Standard device in this field
- Comparability with other studies
- Provides unique measures/features
- Technical specifications (i.e. long battery life, large storage space, etc.)
- Manufacturer provides software
- Has a screen
- Has no screen
- High compliance
- Other: Text

## 7. Where is/are the device(s) placed on the body?

You can select the appropriate marker on the right side. Point your cursor at the appropriate location on the body where the accelerometer is placed and do a single left-click. The selected marker will appear to indicate the position. You can also drag & drop the markers to adjust the location or left-click them again to make them disappear.

If necessary, you may use the with circle and square symbols to indicate (non-)dominant sides by placing them close to the marker.

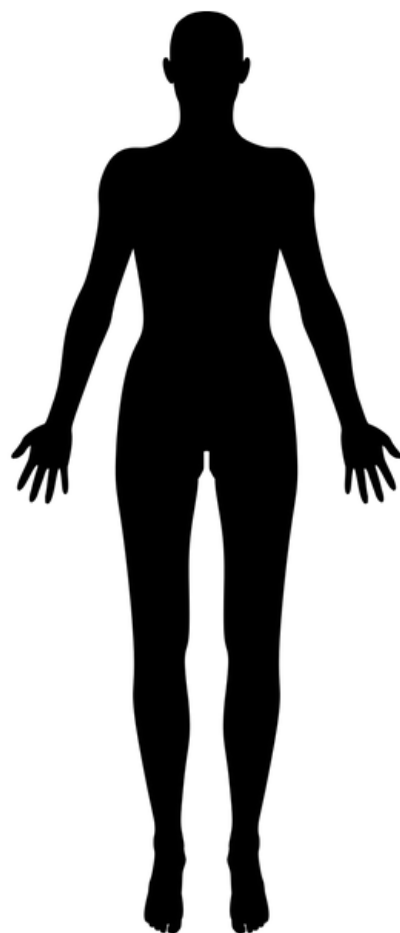

 Use this symbol for devices placed on the front or side of the body

 Use this symbol for devices placed on the back of the body

If necessary, use this symbol to indicate that the device was located on the dominant side

If necessary, use this symbol to indicate that the device was located on the non-dominant side

**8. At what rate are you sampling?**

- Numbers Hertz
- I don't know

**9. Which program(s) are you using to download and process the accelerometer-derived data?**

(multiple answers)

- ActiLife
- ActiSci
- Body Media InnerView Research Software
- Freiburg monitoring system
- KineSoft
- MAHUffe
- R-Package "GGIR"
- R-Package "Physical activity"
- SAS SUDAAN
- Other: Text
- I don't know

**10. What is the epoch length you use for your analyses?**

- Predominantly using: Numbers seconds
- Other definition: Numbers
- Not applicable

**11. Please describe shortly how you defined non-wear time:**

- Numbers minutes of continuous counts of zero activity with a tolerance of up to numbers minutes of activity
- Other definition: Text
- I don't know

**12. What amount of wear-time is required for a dataset to be considered valid in your research?**

- Numbers days with at least numbers hours of recorded wear-time
- Other definition: Text
- I don't know

**13. Please specify if you ever have encountered major problems caused by the monitoring device?**

By that, we mean problems that are caused by the device itself and not by, for example, accompanying software, etc.

- Text
- I have not encountered any major problems
- I don't know
- I have not worked with the monitoring device

**14. What is/are the format/s of the accelerometer-derived data you are typically using?**

*(multiple answers)*

- Activity counts
- Raw acceleration
- ENMO
- Mean amplitude
- Step counts
- Energy expenditure in kJ/kcal
- MET minutes
- Other: Text
- I don't know (yet)

**15. Do you classify your data into PA levels?**

- Yes
- No
- I don't know

**16. Which intensities are relevant for your research?**

*(multiple answers)*

- Sedentary time (<1,5 MET)
- Low PA ( $\geq 1,5$  MET, <3 MET)
- Moderate PA ( $\geq 3$  MET, <6 MET)
- Vigorous PA ( $\geq 6$  MET)
- MVPA
- Sleep time
- Other definitions: Text

**17. Are you using established cut-offs, or are you developing them specifically for this research?**

- Established cut-offs
- Newly developed cut-offs
- I don't know

**18. Please specify if there is a need for any validation studies that would help your research (for example, validation of PA intensity cut-points for different subgroups/accelerometer placements, validations using a specific statistical method, etc.)?**

Text

**19. Below, you will find a list of features for software downloading and processing accelerometer-derived data. Please rate how important each feature is for your research.**

**Data downloading and exporting**

|                                                       | Not at all important  | Moderately important  | Very important        | I don't know          |
|-------------------------------------------------------|-----------------------|-----------------------|-----------------------|-----------------------|
| Detection and deletion options for implausible values | <input type="radio"/> | <input type="radio"/> | <input type="radio"/> | <input type="radio"/> |
| Data visualisation                                    | <input type="radio"/> | <input type="radio"/> | <input type="radio"/> | <input type="radio"/> |
| Output in different file formats                      | <input type="radio"/> | <input type="radio"/> | <input type="radio"/> | <input type="radio"/> |
| Conversion of raw data to activity counts             | <input type="radio"/> | <input type="radio"/> | <input type="radio"/> | <input type="radio"/> |
| Algorithmic estimation of non-wear time               | <input type="radio"/> | <input type="radio"/> | <input type="radio"/> | <input type="radio"/> |

**Are there any other important features not mentioned in the list above?**

Text

**Calculation options**

|                                             | Not at all important  | Moderately important  | Very important        | I don't know          |
|---------------------------------------------|-----------------------|-----------------------|-----------------------|-----------------------|
| Single axes options                         | <input type="radio"/> | <input type="radio"/> | <input type="radio"/> | <input type="radio"/> |
| Vector magnitude options                    | <input type="radio"/> | <input type="radio"/> | <input type="radio"/> | <input type="radio"/> |
| Calculation options for hip placement       | <input type="radio"/> | <input type="radio"/> | <input type="radio"/> | <input type="radio"/> |
| Calculation options for wrist placement     | <input type="radio"/> | <input type="radio"/> | <input type="radio"/> | <input type="radio"/> |
| Calculation options for thigh placement     | <input type="radio"/> | <input type="radio"/> | <input type="radio"/> | <input type="radio"/> |
| Calculation options for ankle placement     | <input type="radio"/> | <input type="radio"/> | <input type="radio"/> | <input type="radio"/> |
| Calculation options for multiple placements | <input type="radio"/> | <input type="radio"/> | <input type="radio"/> | <input type="radio"/> |
| Activity recognition                        | <input type="radio"/> | <input type="radio"/> | <input type="radio"/> | <input type="radio"/> |
| Options for bouts                           | <input type="radio"/> | <input type="radio"/> | <input type="radio"/> | <input type="radio"/> |

**Are there any other important features not mentioned in the list above?**

Text

**Parameter outputs**

|                                                      | Not at all important  | Moderately important  | Very important        | I don't know          |
|------------------------------------------------------|-----------------------|-----------------------|-----------------------|-----------------------|
| Identification of posture (lying, standing, sitting) | <input type="radio"/> | <input type="radio"/> | <input type="radio"/> | <input type="radio"/> |
| MVPA analyses                                        | <input type="radio"/> | <input type="radio"/> | <input type="radio"/> | <input type="radio"/> |
| Sedentary activity recognition                       | <input type="radio"/> | <input type="radio"/> | <input type="radio"/> | <input type="radio"/> |
| Sleep time (including indicators of sleep quality)   | <input type="radio"/> | <input type="radio"/> | <input type="radio"/> | <input type="radio"/> |
| Estimation of energy expenditure                     | <input type="radio"/> | <input type="radio"/> | <input type="radio"/> | <input type="radio"/> |
| Step counts                                          | <input type="radio"/> | <input type="radio"/> | <input type="radio"/> | <input type="radio"/> |

**Are there any other important features not mentioned in the list above?**

Text

**20. Please specify if you have ever encountered major problems working with software meant to download and process accelerometer data?**

- Text
- I have not encountered any major problems
- I have not worked with software meant for accelerometer data downloading and processing
- I don't know

**21. We understand that the field of accelerometry-based research is broad. If at any point you found that the answers did not account for any of the scenarios in your research or if you have any other comments, feedback, additions, or critique, please leave a comment.**

Text
